# Supplementary material for: Physicochemical Characterization and Viability Assays of a Promising Formulation of Liposomes (DODAB‐DOPC) in Complexation with ctDNA
Source: Hindawi journal article supplement (doi:10.1155/2022/3085103), 2022-01-01
Supplement: f1 [file 3085103.f1.docx]

**Supplementary Material**

In this section we include the results which we refer to as supplementary material in the manuscript. We mainly include the mentioned graphs.


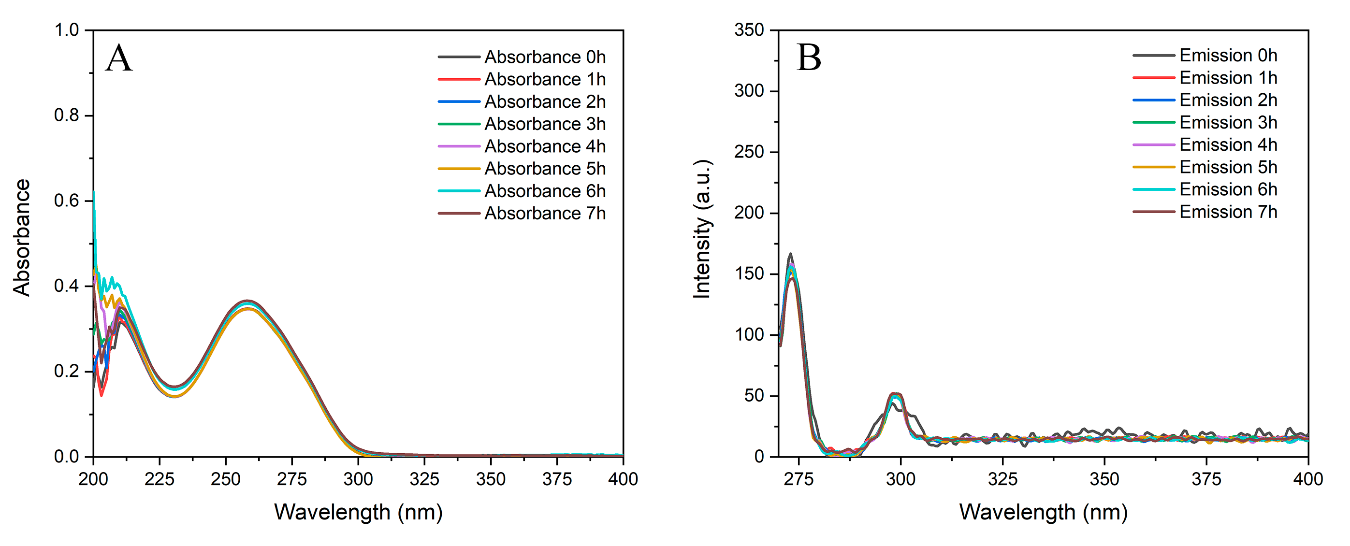


**Fig. S1.** ctDNA stability measurements over time by (A) UV-Vis and (B) fluorescence. The measurements were recorded for 7 h at 25°C in HEPES buffer at pH=7.4


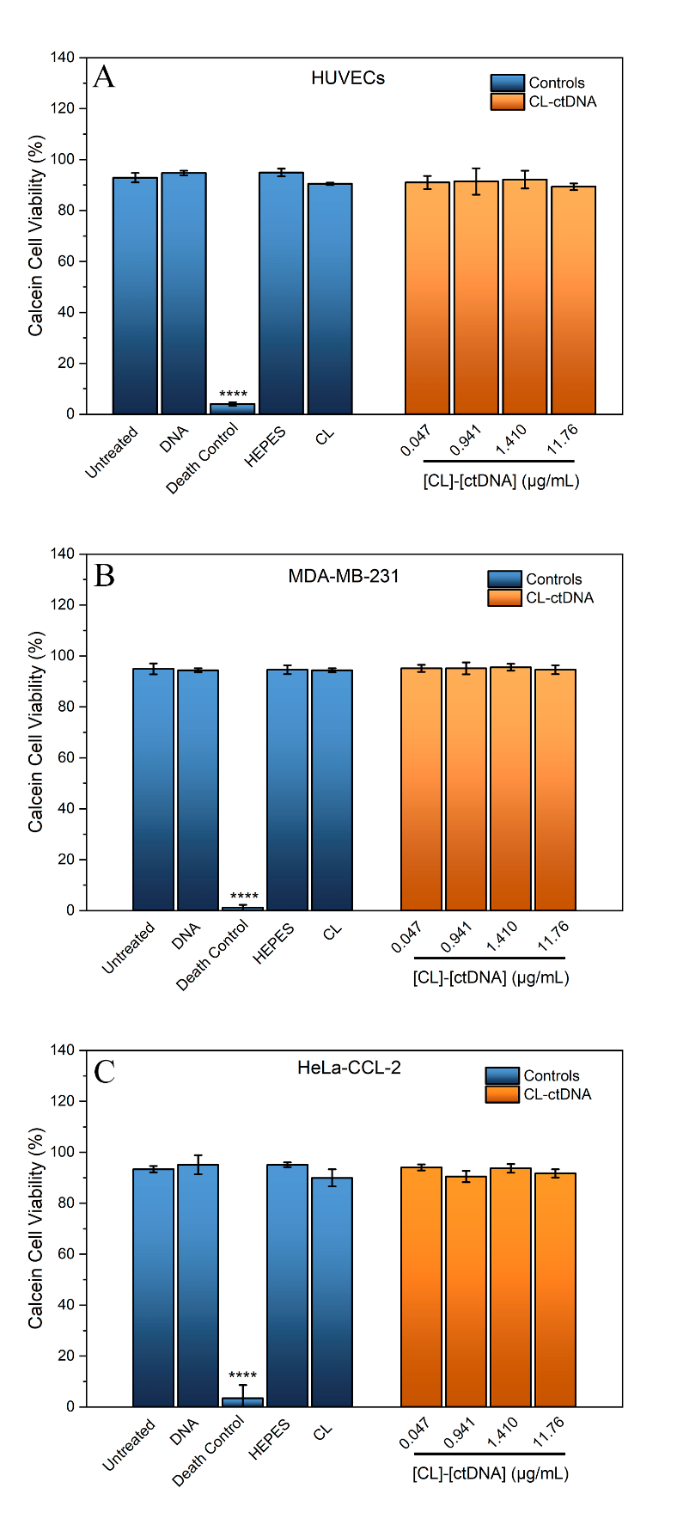


**Fig. S2.** Calcein-AM viability assays. Flow cytometry measurements of viability in **(A)** HUVEC, **(B)** MDA-MB-231, and **(C)** HeLa-CCL-2 cell lines were performed by triplicate using Calcein-AM according to the classification strategy described Fig. S3. The graph represents the mean ± S.D. of three independent experiments, expressed as cell viability %. Culture conditions are indicated below bars: Untreated cells as control of viability [2.5×105 cells/well]; DNA [80 g/mL ctDNA alone treated cells]; Death control [70°C/20 min treated cells]; 4 mM HEPES treated cells; CL 0.133 mM treated cells; and [CL]-[ctDNA] treated cells. **** denotes p < 0.0005 compared to untreated cells (One-Way ANOVA with Bonferroni’s post hoc test).


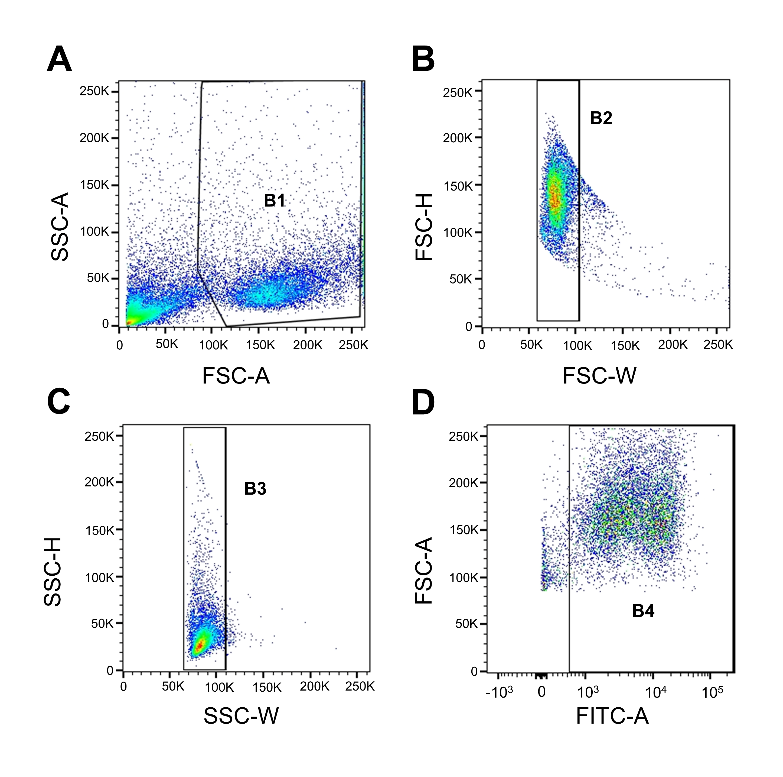


**Fig. S3.** Calcein AM configuration. A representative analysis of the cell lines in BD FACS Verse, gating cells by **(B)** forward scatter (FSC), **(C)**side scatter (SSC), and **(D)** gating of positive Calcein AM cells in FITC-A (B4). 10,000 events in **(D)** for Calcein-AM expression were detected.


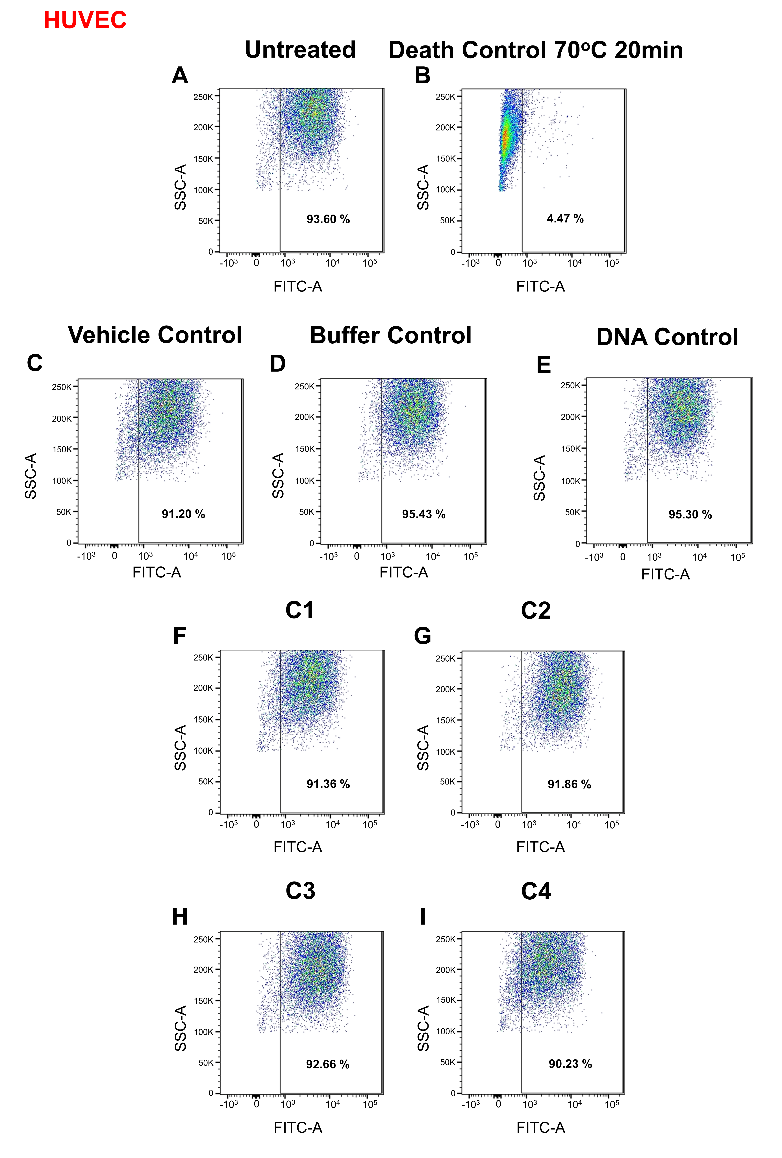


**Fig. S4.** HUVEC cells viability by FACS using Calcein-AM. A representative dot-plot of Calcein-AM viable cells detection in HUVECs is shown. 10,000 events in D for Calcein-AM expression (FITC-A channel) were detected **(**Fig. S3-D**)**. Gated cells into dot-plots are Calcein-AM- positive viable cells **(A)** positive viability control (untreated cells), **(C)** vehicle control (CL alone treated cells), (D) buffer control (HEPES), (E) ctDNA Control (ctDNA alone treated cells), and [CL]-[ctDNA] treated cells C1 (0.047 µg/mL) in **(F)**, C2 (0.941 µg/mL) **(G)**, C3 (1.410 µg/mL) **(H)**, and C4 (11.76 µg/mL) **(I)**.


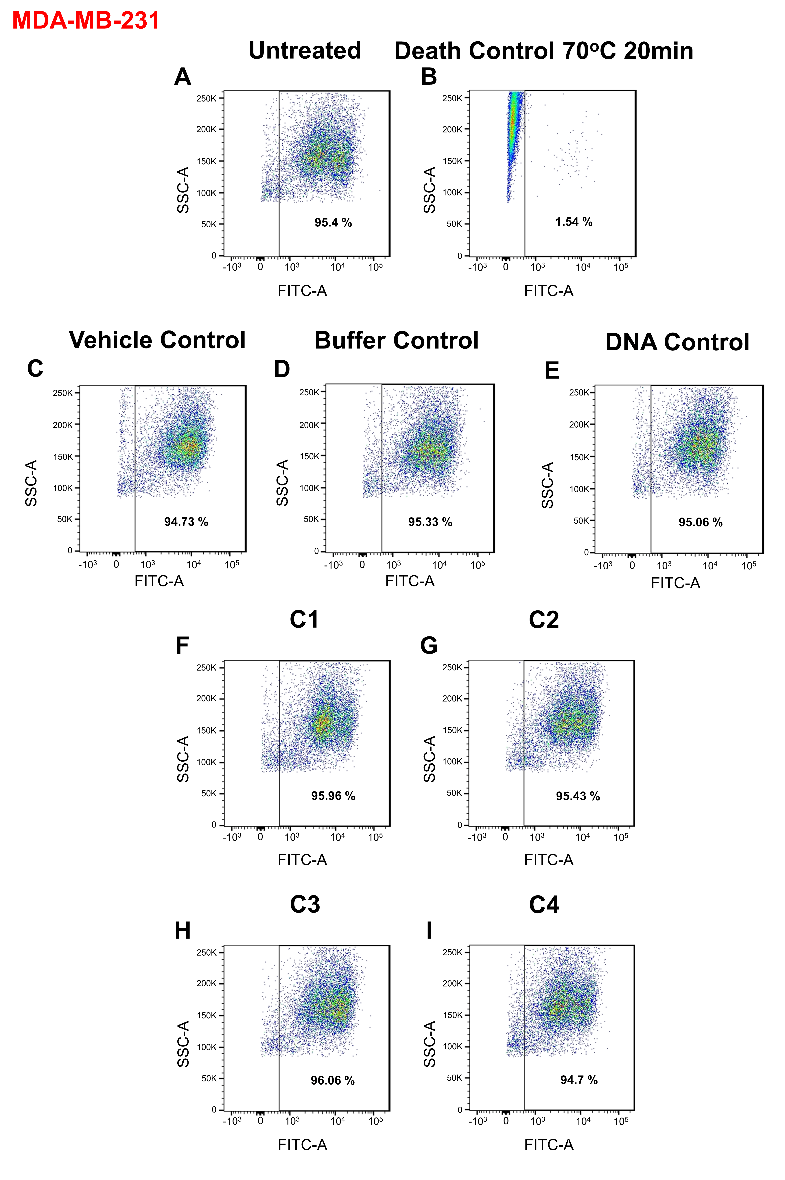


**Fig. S5.** MDA-MB-231 cells viability by FACS using Calcein-AM. A representative dot-plot of Calcein-AM detection in MDA-MB-231cells, 10,000 events in D for Calcein-AM expression (FITC-A channel) were detected **(**Fig. S3-D**)**. Gated cells into dot-plots are Calcein-AM- positive viable cells **(A)** positive viability control (untreated cells), **(C)** vehicle control (CL alone treated cells), **(D)** buffer control (HEPES), **(E)** ctDNA Control (ctDNA alone treated cells), and [CL]-[ctDNA] treated cells C1 (0.047 µg/mL) in **(F)**, C2 (0.941 µg/mL) **(G)**, C3 (1.410 µg/mL) **(H)**, and C4 (11.76 µg/mL) **(I)**.


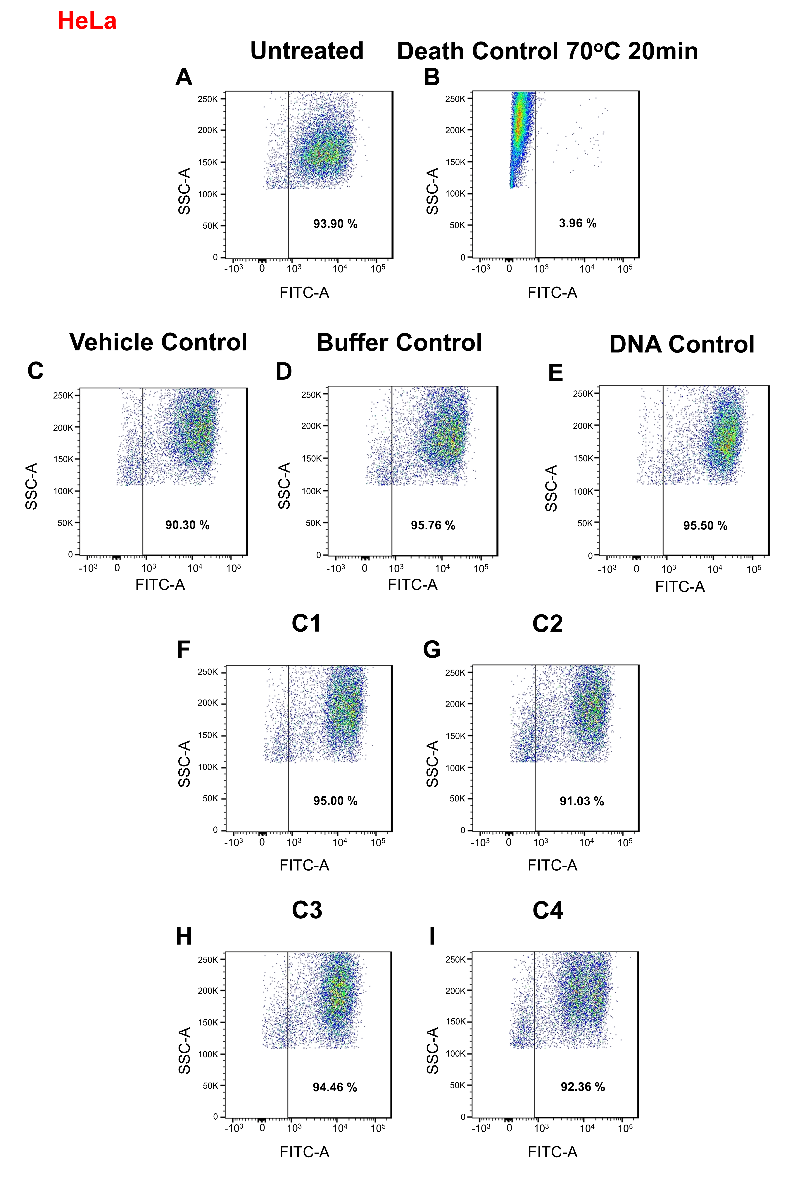


**Fig. S6.** HeLa-CCL-2 cells viability by FACS using Calcein-AM. A representative dot-plot of Calcein-AM detection in HeLa-CCL-2 cells is shown. 10,000 events in D for Calcein-AM expression (FITC-A channel) were detected **(**Fig. S3-D**)**. Gated cells into dot-plots are Calcein-AM- positive viable cells **(A)** positive viability control (untreated cells), **(C)** vehicle control (CL alone treated cells), **(D)** buffer control (HEPES), **(E)** ctDNA Control (ctDNA alone treated cells), and [CL]-[ctDNA] treated cells C1 (0.047 µg/mL) in **(F)**, C2 (0.941 µg/mL) **(G)**, C3 (1.410 µg/mL) **(H)**, and C4 (11.76 µg/mL) **(I)**.
